# Supplementary material for: Coral calcifying fluid aragonite saturation states derived from Raman spectroscopy
Source: Copernicus journal article supplement (doi:10.5194/bg-2017-194), 2017-06-29
Supplement: Supplementary file 2 [file Supplement_text_and_figures.pdf › Supplement_text_and_figures.pdf]

# Supplement to “Coral calcifying fluid aragonite saturation states derived from Raman spectroscopy”: additional measurement details

Raman peak widths are known to be sensitive to instrument configuration (Nasdala et al., 2001; Wang et al., 2012; Váci, 2014). Measured peak width is generally considered a convolution of a Gaussian curve that reflects instrument noise, and the true Lorentzian sample peak (Verma et al., 1995). The width of the instrumental peak depends on the spectral resolution (Nasdala et al., 2001). If spectral resolution is too low, the instrumental peak can partially or completely obscure variations of the sample peak width. Measurements of the abiogenic aragonites (Table S1) conducted on the WITec instrument with 600 mm<sup>-1</sup> grating and a spectral resolution of 3 cm<sup>-1</sup> produced wider peaks and noisier results, compared to the measurements conducted with 1200 mm<sup>-1</sup> grating at 1.3 cm<sup>-1</sup> resolution (Fig. S1). The effect of spectral resolution on measured peak width can be accounted for using the formula of Nasdala et al. (2001) (equation 3 in main text). Following this correction brings the measurements conducted on the WITec and the Horiba instruments close to a 1:1 line (Table S2; Fig. S2). This is critical because it suggests that measurements conducted in other laboratories should be able to use the FWHM- $\Omega_{Ar}$  calibration presented here, if spectral resolution is known and the true sample peak widths are calculated. Indeed, the calibration remains effectively constant over time and thus daily instrument calibration using abiogenic samples is not necessarily required for detecting  $\Omega_{Ar}$  changes > ~2 units (Fig. S3). However, it is important to recognize that the Nasdala et al. (2001) formula is only valid when the true peak width exceeds twice the spectral resolution, meaning that for a true peak width of 2.9 cm<sup>-1</sup> ( $\Omega_{Ar}$  of approximately 10), a spectral resolution of 1.45 cm<sup>-1</sup> or better is required. To achieve this resolution on the WITec instrument required using a 1200 mm<sup>-1</sup> grating, which allowed a spectral range of only 750 cm<sup>-1</sup>. This relatively small spectral range made it impossible to capture both the 1085 cm<sup>-1</sup>  $\nu_1$  peak and the aragonite lattice modes in the 100-250 cm<sup>-1</sup> range. We found the optimal configuration was to place the spectral center at 830 cm<sup>-1</sup>, which captures both the  $\nu_1$  FWHM to calculate  $\Omega_{Ar}$ , and the ~705 cm<sup>-1</sup>  $\nu_4$  peak to confirm the presence of aragonite.

The precision of peak width measurements depends not only on the spectral resolution, but also on integration time. Relatively long (short) integration times will produce high (low) signal-noise ratios. We repeatedly (n=10) analysed the same spot on the same aragonite grain (from experiment f06) using integration times ranging from 0.05 s to 10 s. The standard deviation ( $\sigma$ ) of  $\nu_1$  FWHM decreased with longer integration times (Fig. S4). At 0.05 s integration time, the  $\sigma$  of  $\nu_1$  FWHM was 0.2 cm<sup>-1</sup>, which covers more than half of the range of the calibration between  $\Omega_{Ar}$  10 and 30. Integration time of at least 0.5 s was required to reduce  $\sigma$  below 0.05 cm<sup>-1</sup>. The improvement in precision decreases rapidly beyond 1 s integration time, and thus we found that integration times between 0.5 and 1 s provided the best compromise between precision and analysis time. Calibration between  $\nu_1$  FWHM and  $\Omega_{Ar}$  was practically identical using integration times of 1 s or 5 s, but the slope became slightly shallower with integration time of 0.1 s, likely due to decreasing precision and measurement noise (Fig. S5).

## References

- DeCarlo, T. M., Gaetani, G. A., Holcomb, M., and Cohen, A. L.: Experimental determination of factors controlling U/Ca of aragonite precipitated from seawater: implications for interpreting coral skeleton, *Geochimica et cosmochimica acta*, 162, 151–165, doi:doi:10.1016/j.gca.2015.04.016, 2015.
- 5 D’Olivo, J. P. and McCulloch, M. T.: Response of coral calcification and calcifying fluid composition to thermally induced bleaching stress, *Scientific Reports*, 2017.
- Holcomb, M., DeCarlo, T., Gaetani, G., and McCulloch, M.: Factors affecting B/Ca ratios in synthetic aragonite, *Chemical Geology*, doi:10.1016/j.chemgeo.2016.05.007, 2016.
- Nasdala, L., Wenzel, M., Vavra, G., Irmer, G., Wenzel, T., and Kober, B.: Metamictisation of natural zircon: accumulation versus thermal annealing of radioactivity-induced damage, *Contributions to Mineralogy and Petrology*, 141, 125–144, doi:10.1007/s004100000235, 2001.
- 10 Váczi, T.: A New, Simple Approximation for the Deconvolution of Instrumental Broadening in Spectroscopic Band Profiles, *Applied Spectroscopy*, 68, 1274–1278, doi:10.1366/13-07275, 2014.
- Verma, P., Abbi, S. C., and Jain, K. P.: Raman-scattering probe of anharmonic effects in GaAs, *Physical Review B*, 51, 16 660–16 667, doi:10.1103/PhysRevB.51.16660, 1995.
- 15 Wang, D., Hamm, L. M., Bodnar, R. J., and Dove, P. M.: Raman spectroscopic characterization of the magnesium content in amorphous calcium carbonates, *Journal of Raman Spectroscopy*, 43, 543–548, 2012.

**Table S1.** Summary of fluid conditions and precipitate Mg/Ca for the abiogenic aragonites analysed in this study

| ID  | $T$<br>(°C) | $\Omega_{Ar}$ | $G$<br>(mmol m <sup>-2</sup> hr <sup>-1</sup> ) | pH<br>(total scale) | [CO <sub>3</sub> <sup>2-</sup> ]<br>(μmol kg <sup>-1</sup> ) | Mg/Ca<br>(mmol mol <sup>-1</sup> ) | $K_D^{Mg/Ca}$<br>(x10 <sup>-3</sup> ) |
|-----|-------------|---------------|-------------------------------------------------|---------------------|--------------------------------------------------------------|------------------------------------|---------------------------------------|
| h02 | 20          | 29 (4)        | 3.4                                             | 8.88 (0.01)         | 2060 (90)                                                    | 9.15                               | 1.68 (0.02)                           |
| h08 | 20          | 21 (4)        | 2.2                                             | 8.20 (0.01)         | 1600 (90)                                                    | 6.73                               | 1.17 (0.01)                           |
| f01 | 25.5        | 16 (4)        | 4.1                                             | 8.62 (0.02)         | 1310 (70)                                                    | 7.52                               | 1.01 (0.01)                           |
| f02 | 25.5        | 19 (3)        | 5.6                                             | 8.48 (0.02)         | 1400 (100)                                                   | 7.53                               | 1.22 (0.01)                           |
| f03 | 25.5        | 30 (4)        | 13                                              | 8.96 (0.02)         | 2100 (100)                                                   | 9.58                               | 1.63 (0.02)                           |
| f04 | 25.5        | 19 (3)        | 5.6                                             | 8.16 (0.01)         | 1380 (70)                                                    | 7.18                               | 1.12 (0.01)                           |
| f05 | 25.5        | 34 (3)        | 16                                              | 9.03 (0.01)         | 2560 (80)                                                    | 11.3                               | 1.76 (0.02)                           |
| f06 | 25.5        | 11 (1)        | 2                                               | 8.38 (0.01)         | 860 (60)                                                     | 4.93                               | 0.77 (0.01)                           |
| f08 | 25.5        | 12 (4)        | 2.4                                             | 7.90 (0.07)         | 600 (200)                                                    | 2.56                               | -                                     |
| g01 | 25.5        | 21 (4)        | 6.7                                             | 8.80 (0.02)         | 1600 (100)                                                   | 8.35                               | 1.41 (0.01)                           |
| g02 | 25.5        | 25 (1)        | 8.2                                             | 8.40 (0.04)         | 1600 (100)                                                   | 7.18                               | 1.30 (0.02)                           |
| g03 | 25.5        | 17 (3)        | 4.6                                             | 8.43 (0.01)         | 1230 (80)                                                    | 6.14                               | 1.06 (0.01)                           |
| g04 | 25.5        | 25 (3)        | 9.1                                             | 8.48 (0.01)         | 1720 (60)                                                    | 7.67                               | 1.39 (0.01)                           |
| g05 | 25.5        | 18 (2)        | 5                                               | 8.02 (0.02)         | 1320 (70)                                                    | 6.55                               | 1.10 (0.02)                           |
| g07 | 25.5        | 24 (3)        | 8.4                                             | 8.00 (0.01)         | 1700 (200)                                                   | 7.42                               | 1.31 (0.01)                           |
| g08 | 25.5        | 26 (4)        | 9.7                                             | 8.49 (0.02)         | 1900 (100)                                                   | 8.23                               | 1.36 (0.02)                           |
| g09 | 25.5        | 23 (5)        | 7.8                                             | 7.78 (0.02)         | 1700 (200)                                                   | 6.84                               | 1.10 (0.02)                           |
| g10 | 25.5        | 18 (3)        | 5                                               | 8.06 (0.04)         | 1500 (100)                                                   | 7.37                               | 1.09 (0.02)                           |
| g11 | 25.5        | 17 (2)        | 4.6                                             | 7.79 (0.02)         | 1290 (70)                                                    | 6.26                               | 1.04 (0.01)                           |
| g13 | 25.5        | 10 (3)        | 1.7                                             | 7.89 (0.02)         | 600 (100)                                                    | 2.46                               | -                                     |
| h01 | 25.5        | 21 (4)        | 6.7                                             | 8.86 (0.01)         | 1690 (80)                                                    | 9.28                               | 1.50 (0.01)                           |
| h09 | 25.5        | 14 (3)        | 3.2                                             | 7.89 (0.03)         | 1100 (100)                                                   | 5.56                               | 0.85 (0.01)                           |
| h10 | 25.5        | 21 (4)        | 6.7                                             | 7.78 (0.03)         | 1600 (100)                                                   | 7.9                                | 1.30 (0.03)                           |
| h13 | 25.5        | 28 (12)       | 11                                              | 9.32 (0.02)         | 1900 (500)                                                   | 11.1                               | 1.81 (0.02)                           |
| h03 | 33          | 17 (3)        | 18                                              | 8.69 (0.03)         | 1300 (100)                                                   | 7.29                               | 1.23 (0.02)                           |
| h07 | 33          | 15 (1)        | 14                                              | 8.13 (0.03)         | 1070 (40)                                                    | 6.19                               | 1.13 (0.01)                           |
| h05 | 40          | 15 (2)        | 45                                              | 8.67 (0.01)         | 1110 (40)                                                    | 7.08                               | 1.23 (0.01)                           |
| h06 | 40          | 12 (2)        | 24                                              | 8.12 (0.04)         | 850 (60)                                                     | 5.64                               | 1.00 (0.01)                           |

Notes: Carbonate chemistry and temperature data were published in DeCarlo et al. (2015) and Mg/Ca data are from Holcomb et al. (2016); numbers in parentheses indicate 1 standard deviation during the course of aragonite precipitation.  $K_D^{Mg/Ca}$  was calculated following DeCarlo et al. (2015).

**Table S2.** Summary of Raman peak characteristics

| ID  | Horiba<br>measured<br>$\nu_1$ height | Horiba<br>measured<br>$\nu_1$ position<br>( $\text{cm}^{-1}$ ) | Horiba<br>measured<br>$\nu_1$ FWHM<br>( $\text{cm}^{-1}$ ) | Horiba<br>TRUE<br>$\nu_1$ FWHM<br>( $\text{cm}^{-1}$ ) | WITec<br>measured<br>$\nu_1$ FWHM<br>( $\text{cm}^{-1}$ ) | WITec<br>TRUE<br>$\nu_1$ FWHM<br>( $\text{cm}^{-1}$ ) |
|-----|--------------------------------------|----------------------------------------------------------------|------------------------------------------------------------|--------------------------------------------------------|-----------------------------------------------------------|-------------------------------------------------------|
| h02 | 1.1 (0.2)                            | -                                                              | 3.97 (0.04)                                                | 3.58 (0.05)                                            | -                                                         | -                                                     |
| h08 | 2.1 (0.3)                            | 1085.15 (0.11)                                                 | 3.89 (0.08)                                                | 3.50 (0.08)                                            | -                                                         | -                                                     |
| f01 | 1.6 (0.1)                            | 1085.38 (0.01)                                                 | 3.57 (0.14)                                                | 3.14 (0.16)                                            | -                                                         | -                                                     |
| f02 | 1.4 (0.3)                            | 1085.36 (0.03)                                                 | 3.61 (0.04)                                                | 3.19 (0.04)                                            | 3.75 (0.02)                                               | 3.27 (0.02)                                           |
| f03 | 1.5 (0.3)                            | 1085.34 (0.01)                                                 | 4.06 (0.04)                                                | 3.69 (0.04)                                            | 4.05 (0.02)                                               | 3.61 (0.02)                                           |
| f04 | 2.0 (0.1)                            | 1085.40 (0.02)                                                 | 3.73 (0.02)                                                | 3.32 (0.03)                                            | -                                                         | -                                                     |
| f05 | 0.6 (0.1)                            | -                                                              | 4.08 (0.03)                                                | 3.70 (0.03)                                            | -                                                         | -                                                     |
| f06 | 3.4 (0.3)                            | 1085.34 (0.03)                                                 | 3.35 (0.03)                                                | 2.89 (0.03)                                            | 3.45 (0.01)                                               | 2.92 (0.01)                                           |
| f08 | 1.0 (0.1)                            | 1085.07 (0.04)                                                 | 3.45 (0.02)                                                | 3.00 (0.02)                                            | -                                                         | -                                                     |
| g01 | 1.1 (0.2)                            | 1085.31 (0.01)                                                 | 3.94 (0.03)                                                | 3.56 (0.03)                                            | -                                                         | -                                                     |
| g02 | 2.6                                  | -                                                              | 3.95                                                       | 3.57                                                   | -                                                         | -                                                     |
| g03 | 2.2                                  | 1085.4                                                         | 3.7                                                        | 3.28                                                   | -                                                         | -                                                     |
| g04 | 1.4 (0.1)                            | 1085.36 (0.02)                                                 | 3.96 (0.03)                                                | 3.58 (0.03)                                            | -                                                         | -                                                     |
| g05 | 2.2 (0.8)                            | 1085.35 (0.01)                                                 | 3.56 (0.10)                                                | 3.13 (0.11)                                            | -                                                         | -                                                     |
| g07 | 1.5 (0.1)                            | -                                                              | 3.88 (0.02)                                                | 3.49 (0.03)                                            | 3.91 (0.02)                                               | 3.45 (0.02)                                           |
| g08 | 1.5 (0.1)                            | -                                                              | 4.01 (0.02)                                                | 3.64 (0.02)                                            | -                                                         | -                                                     |
| g09 | 1.4 (0.3)                            | -                                                              | 3.63 (0.03)                                                | 3.21 (0.04)                                            | -                                                         | -                                                     |
| g10 | 1.4 (0.1)                            | 1085.32 (0.01)                                                 | 3.52 (0.06)                                                | 3.08 (0.07)                                            | -                                                         | -                                                     |
| g11 | 1.5 (0.1)                            | 1085.41 (0.02)                                                 | 3.44 (0.06)                                                | 2.99 (0.06)                                            | -                                                         | -                                                     |
| g13 | 1.6 (0.2)                            | 1085.25 (0.03)                                                 | 3.32 (0.02)                                                | 2.86 (0.02)                                            | 3.46 (0.01)                                               | 2.93 (0.01)                                           |
| h01 | 1.2 (0.1)                            | 1085.31 (0.04)                                                 | 3.70 (0.06)                                                | 3.28 (0.07)                                            | -                                                         | -                                                     |
| h09 | 1.9 (0.2)                            | 1085.46 (0.03)                                                 | 3.37 (0.03)                                                | 2.92 (0.03)                                            | 3.52 (0.01)                                               | 3.00 (0.01)                                           |
| h10 | 2.0 (0.4)                            | 1085.32 (0.03)                                                 | 3.79 (0.05)                                                | 3.39 (0.06)                                            | -                                                         | -                                                     |
| h13 | 2.9 (0.3)                            | 1085.33 (0.01)                                                 | 4.00 (0.04)                                                | 3.63 (0.04)                                            | -                                                         | -                                                     |
| h03 | 1.9 (0.2)                            | 1085.38 (0.02)                                                 | 3.56 (0.05)                                                | 3.13 (0.05)                                            | -                                                         | -                                                     |
| h07 | 1.7 (0.3)                            | 1085.38 (0.01)                                                 | 3.63 (0.08)                                                | 3.20 (0.09)                                            | -                                                         | -                                                     |
| h05 | 1.5 (0.1)                            | 1085.40 (0.03)                                                 | 3.52 (0.06)                                                | 3.09 (0.07)                                            | -                                                         | -                                                     |
| h06 | 3.5                                  | 1085.41                                                        | 3.37                                                       | 2.91                                                   |                                                           |                                                       |

Notes: Numbers in parentheses indicate 1 standard error of the mean of replicate Raman spectra. Where no parentheses are displayed, only 1 spectrum was collected. Dashes in the position column indicate spectra collected on a different day when the wavenumber calibration drifted by  $2 \text{ cm}^{-1}$  and were thus excluded.

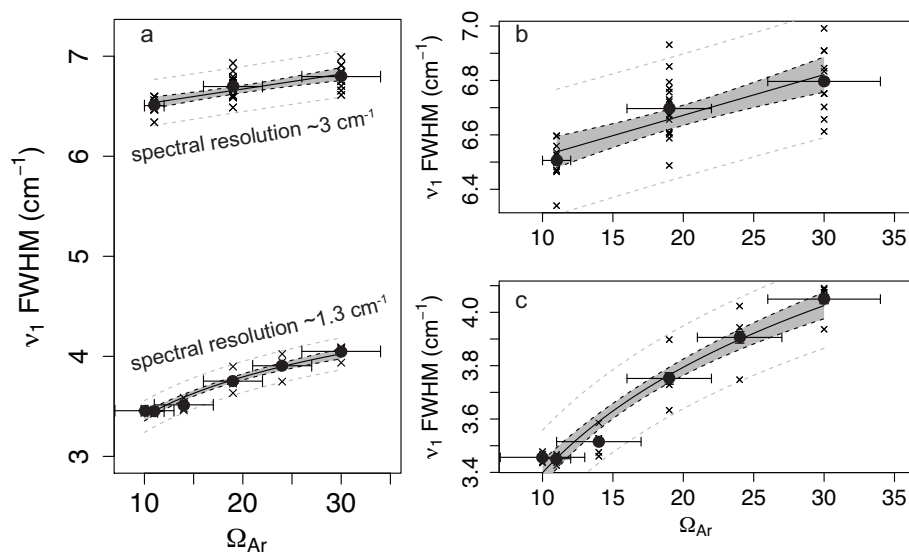

**Figure S1.** Effect of spectral resolution on FWHM measurements. (a)  $\nu_1$  FWHM of the same aragonites measured on the WITec instrument with 3 cm<sup>-1</sup> and 1.3 cm<sup>-1</sup> resolution. (b-c) Same as panel (a), but with y-axes scaled for measurements made at 3 cm<sup>-1</sup> and 1.3 cm<sup>-1</sup> resolution, respectively.

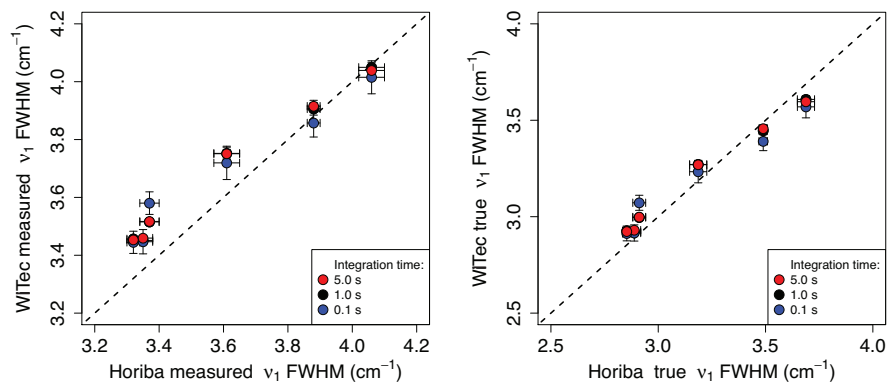

**Figure S2.** Correction of  $\nu_1$  FWHM for spectral resolution. Scatter plots of measured (left) and true (right)  $\nu_1$  FWHM from the Horiba and WITec instruments. Colours show measurements on the WITec instrument conducted with various integration times.

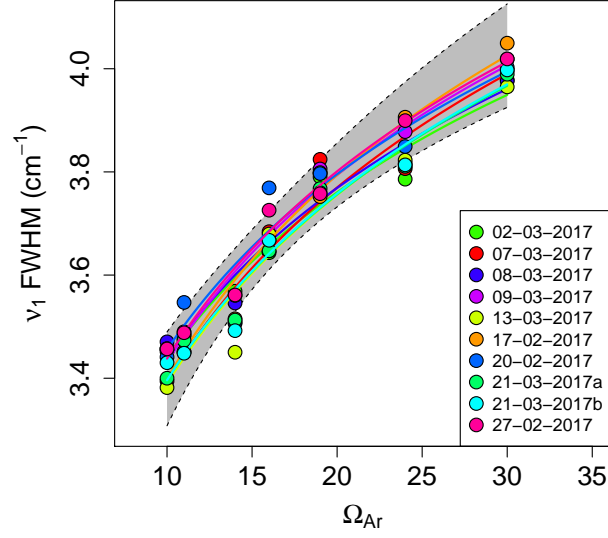

**Figure S3.** Calibrations between measured  $\nu_1$  FWHM and  $\Omega_{Ar}$  determined on multiple days with the WITec instrument. The grey error bound shows the confidence interval for the calibration reported in Table 2. Note that horizontal error bars have been excluded for clarity.

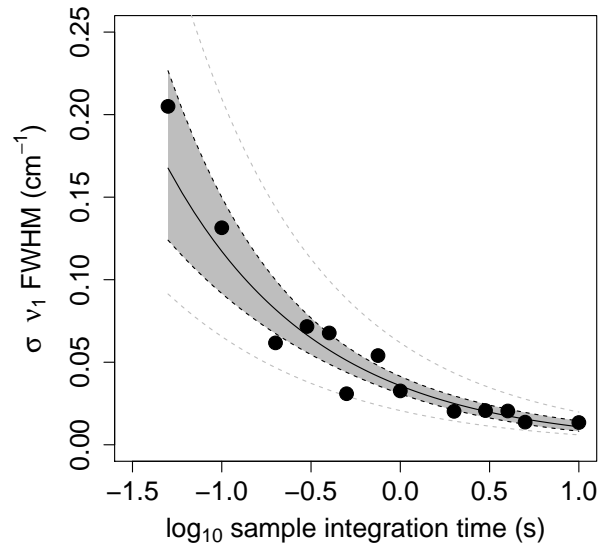

**Figure S4.** Effect of integration time on precision of  $\nu_1$  FWHM measurements. Each point represents  $1\sigma$  of 10 measurements made on the same spot. Grey shading represents the standard error of the curve, and the dashed grey lines represent the standard error of prediction.

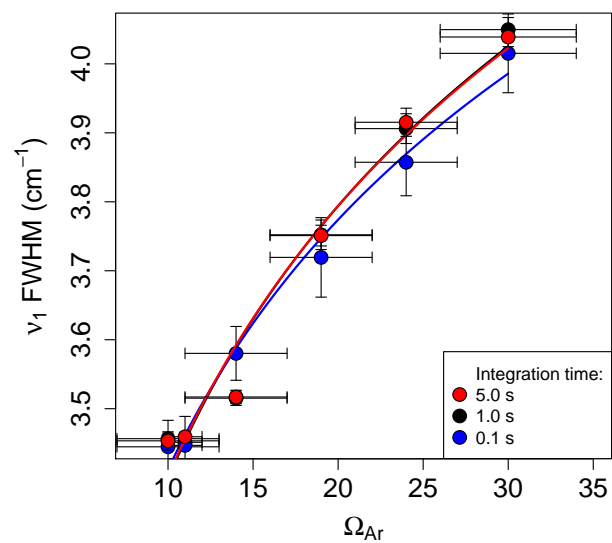

**Figure S5.** Effect of integration time on the calibration between measured  $\nu_1$  FWHM and  $\Omega_{Ar}$ . Red, black, and blue points and lines show calibrations conducted using 5 s, 1 s, and 0.1 s integration times, respectively.
